# Supplementary material for: On the inverse correlation between the hydrogen bond strength and chalcogen bond strength in the cyclic supramolecular heterosynthon [–Se–N]⋯[HOOC–]
Source: Royal Society of Chemistry journal article supplement (doi:10.1039/d3ce00100h), 2023-01-01

Electronic Supplementary Material (ESI) for CrystEngComm.  
This journal is © The Royal Society of Chemistry 2023

## Electronic Supplementary Information

**On the inverse correlation between the hydrogen bond strength and  
chalcogen bond strength in the cyclic supramolecular heterosynthon**

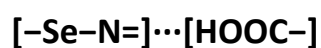

Honghong Lan, Shaobin Miao, Yu Zhang and Weizhou Wang\*

College of Chemistry and Chemical Engineering, Luoyang Normal University, Luoyang 471934, P. R.  
China

E-mail: wzw@lynu.edu.cn

## Index

1. Methods
  - 1.1. Cocrystal synthesis
  - 1.2. Single-crystal X-ray diffraction
  - 1.3. Computational details
2. Table S1 Crystallographic data and structure refinement parameters for cocrystals **I**, **II** and **III**.
3. Fig. S1 The H $\cdots$ N and Se $\cdots$ O interatomic distances (green numbers, in Å) and the electron densities (blue numbers, in au) and their Laplacians (red numbers, in au) at the H $\cdots$ N and Se $\cdots$ O bond critical points in the cyclic supramolecular heterosynthons  $[-\text{Se}-\text{N}=\cdots[\text{HOOC}-]]$  for the complexes formed between 2,1,3-benzoselenadiazole and a series of substituted and unsubstituted benzoic acid.
4. Cartesian coordinates for the  $\pi$ -stacked cluster formed by six 2,1,3-benzoselenadiazole molecules and six isophthalic acid molecules.
5. The CheckCIF reports for cocrystals **I**, **II** and **III**.

## 1. Methods

### 1.1. Cocrystal synthesis

The 2,1,3-benzoselenadiazole (purity  $\geq 98\%$ ), *m*-nitrobenzoic acid (purity  $\geq 98\%$ ), *p*-nitrobenzoic acid (purity  $\geq 98\%$ ), 1,3,5-benzenetricarboxylic acid (purity  $\geq 98\%$ ), and the solvent methanol (analytical reagent grade) were purchased from Zhengzhou Alfa Chemical Co., Ltd., China. All of them were used as received. The 1:1 mixtures of 2,1,3-benzoselenadiazole (0.0183 g, 0.1 mmol) with *m*-nitrobenzoic acid (0.0167 g, 0.1 mmol), *p*-nitrobenzoic acid (0.0167 g, 0.1 mmol) and 1,3,5-benzenetricarboxylic acid (0.0210 g, 0.1 mmol), respectively, were dissolved in 15 mL of methanol, respectively. Upon slow evaporation of the solution at room temperature, cocrystals I, II and III suitable for single-crystal X-ray diffraction were obtained after 2–3 days.

### 1.2. Single-crystal X-ray diffraction

Single-crystal X-ray diffraction data were gathered on an Oxford Diffraction SuperNova area-detector diffractometer equipped with Mo-K $\alpha$  X-ray source ( $\lambda = 0.71073 \text{ \AA}$ ). The data reduction was treated by using CrysAlis Pro software.<sup>1</sup> The crystal structure was solved by SHELXS-2014 program.<sup>2</sup> Crystallographic data of cocrystals I, II and III were listed in Table S1. The CIF files of cocrystals I, II and III (CCDC deposition numbers: 2239190, 2239191 and 2239194) can be obtained free of charge via <http://www.ccdc.cam.ac.uk/conts/retrieving.html>. At the same time, the CIF files of cocrystals I, II and III were also provided as the electronic supplementary materials.

### 1.3. Computational details

The geometries of all the complexes were fully optimized at the PBE0-D3(BJ)/def2-TZVPP level of theory with the Gaussian 09 program.<sup>3-7</sup> All these optimized structures were confirmed to be energy minima by frequency calculations at the same theory level. Previous studies on the noncovalent interactions have shown that the PBE0-D3(BJ)/def2-TZVPP calculations can give comparable results with the “golden standard” coupled cluster calculations.<sup>8,9</sup>

To further confirm the existence of the hydrogen bond and chalcogen bond in the cyclic supramolecular heterosynthon  $[-\text{Se}-\text{N}=\dots[\text{HOOC}-]$ , the “atoms in molecules” (AIM) analysis has been performed with the PBE0-D3(BJ)/def2-TZVPP electron density.<sup>10</sup> The AIM2000 software was employed to carry out the AIM analysis.<sup>11</sup> The analysis went further with those obtained by means of the natural bond orbital (NBO) theory of Weinhhold and co-workers.<sup>12</sup> The NBO analyses used the built-in subroutines of the Gaussian 09 program.

**2. Table S1 Crystallographic data and structure refinement parameters for cocrystals I, II and III.**

| Cocrystal                                                                            | I                                                               | II                                                              | III                                                                           |
|--------------------------------------------------------------------------------------|-----------------------------------------------------------------|-----------------------------------------------------------------|-------------------------------------------------------------------------------|
| CCDC No.                                                                             | 2239190                                                         | 2239191                                                         | 2239194                                                                       |
| Empirical formula                                                                    | C <sub>13</sub> H <sub>9</sub> N <sub>3</sub> O <sub>4</sub> Se | C <sub>13</sub> H <sub>9</sub> N <sub>3</sub> O <sub>4</sub> Se | C <sub>27</sub> H <sub>18</sub> N <sub>6</sub> O <sub>6</sub> Se <sub>3</sub> |
| Formula weight                                                                       | 350.19                                                          | 350.19                                                          | 759.35                                                                        |
| Crystal size/mm <sup>3</sup>                                                         | 0.28 × 0.25 × 0.24                                              | 0.25 × 0.24 × 0.23                                              | 0.24 × 0.21 × 0.2                                                             |
| Crystal system                                                                       | triclinic                                                       | triclinic                                                       | monoclinic                                                                    |
| Space group                                                                          | <i>P</i> -1                                                     | <i>P</i> -1                                                     | <i>P</i> 2 <sub>1</sub>                                                       |
| <i>a</i> /Å                                                                          | 6.6846(2)                                                       | 6.7936(2)                                                       | 3.9284(2)                                                                     |
| <i>b</i> /Å                                                                          | 7.0498(2)                                                       | 7.3480(3)                                                       | 26.3154(12)                                                                   |
| <i>c</i> /Å                                                                          | 15.0256(4)                                                      | 14.7847(5)                                                      | 13.1324(6)                                                                    |
| <i>α</i> /°                                                                          | 97.105(2)                                                       | 76.886(3)                                                       | 90                                                                            |
| <i>β</i> /°                                                                          | 94.771(2)                                                       | 76.865(3)                                                       | 91.977(4)                                                                     |
| <i>γ</i> /°                                                                          | 109.331(3)                                                      | 69.400(4)                                                       | 90                                                                            |
| <i>V</i> /Å <sup>3</sup>                                                             | 657.18(3)                                                       | 663.98(4)                                                       | 1356.79(11)                                                                   |
| <i>Z</i>                                                                             | 2                                                               | 2                                                               | 2                                                                             |
| $\rho_{\text{calc}}/\text{g}\cdot\text{cm}^{-3}$                                     | 1.770                                                           | 1.752                                                           | 1.859                                                                         |
| <i>T</i> /K                                                                          | 290                                                             | 290                                                             | 291                                                                           |
| 2 $\theta$ range for data collection/°                                               | 6.516–56.938                                                    | 6.66–56.7                                                       | 6.928–57.062                                                                  |
| Reflections collected                                                                | 15586                                                           | 15689                                                           | 32014                                                                         |
| Independent reflections [ <i>R</i> <sub>int</sub> ]                                  | 3008 [0.0268]                                                   | 3024 [0.0414]                                                   | 6146 [0.0894]                                                                 |
| <i>R</i> <sub>1</sub> , <i>wR</i> <sub>2</sub> ( <i>I</i> > 2 $\sigma$ ( <i>I</i> )) | 0.0308, 0.0663                                                  | 0.0414, 0.0932                                                  | 0.0660, 0.1020                                                                |
| <i>R</i> <sub>1</sub> , <i>wR</i> <sub>2</sub> (all data)                            | 0.0371, 0.0684                                                  | 0.0537, 0.0980                                                  | 0.0936, 0.1107                                                                |
| Goodness-of-fit on <i>F</i> <sup>2</sup>                                             | 1.097                                                           | 1.092                                                           | 1.059                                                                         |

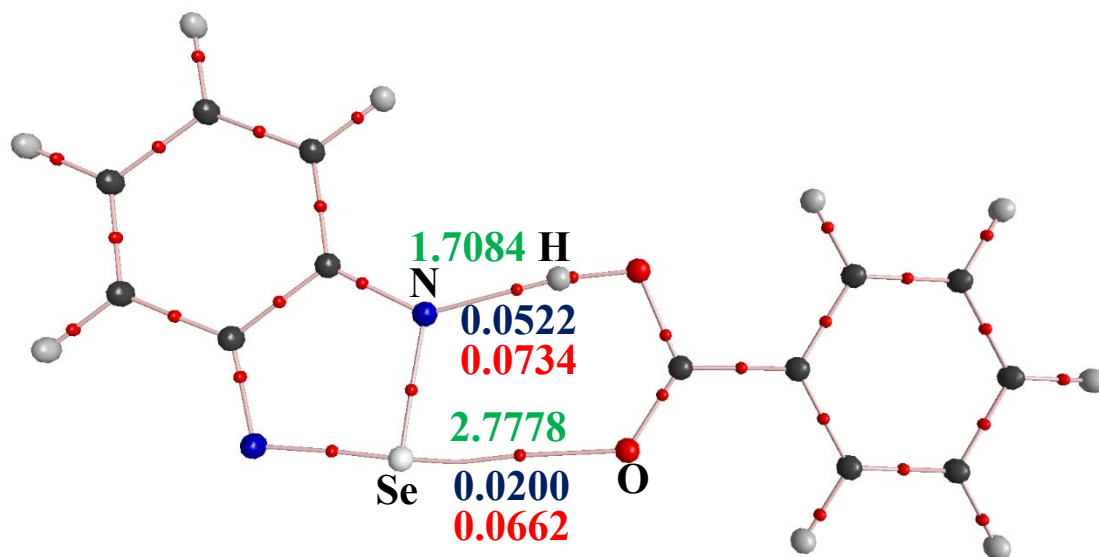

2,1,3-benzoselenadiazole···benzoic acid

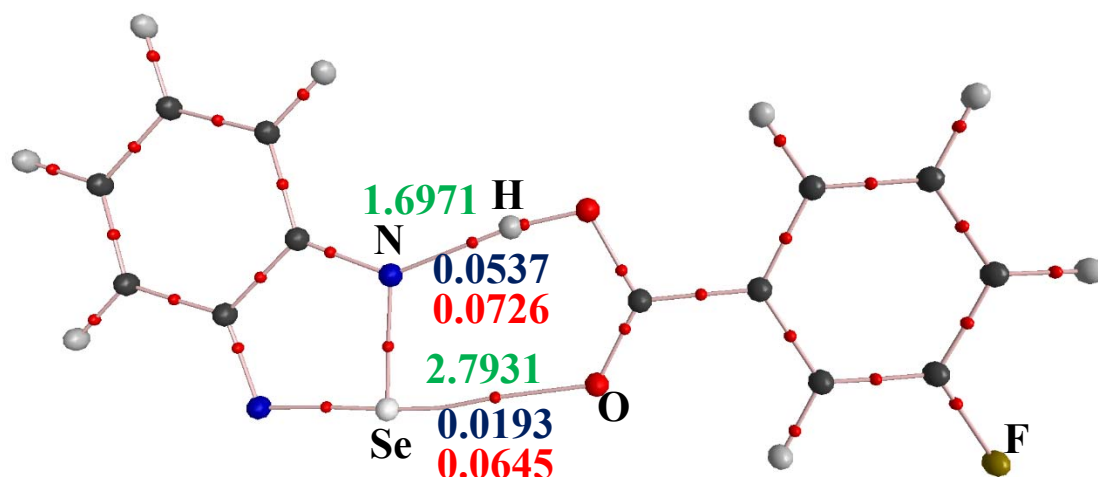

2,1,3-benzoselenadiazole···3-fluorobenzoic acid

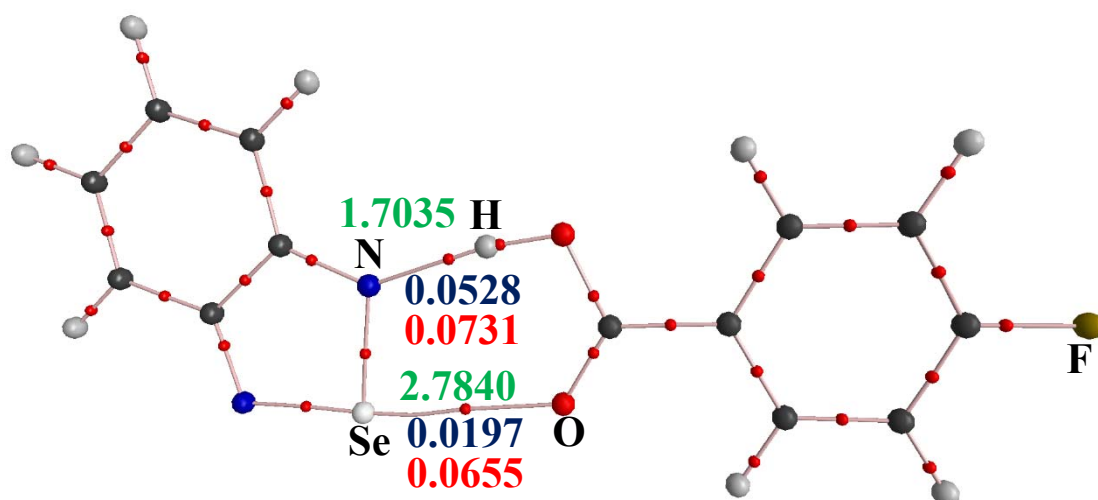

2,1,3-benzoselenadiazole···4-fluorobenzoic acid

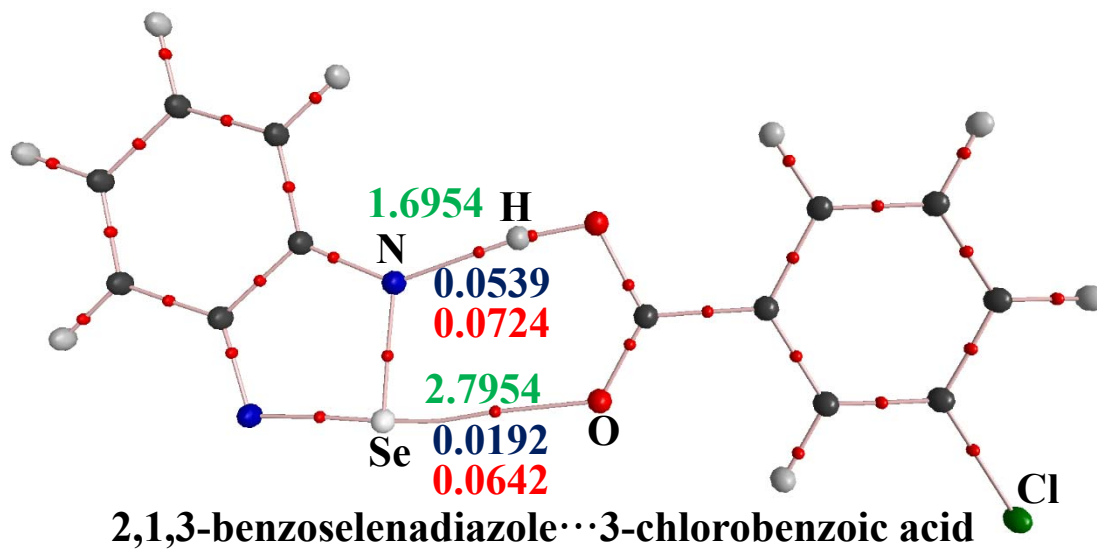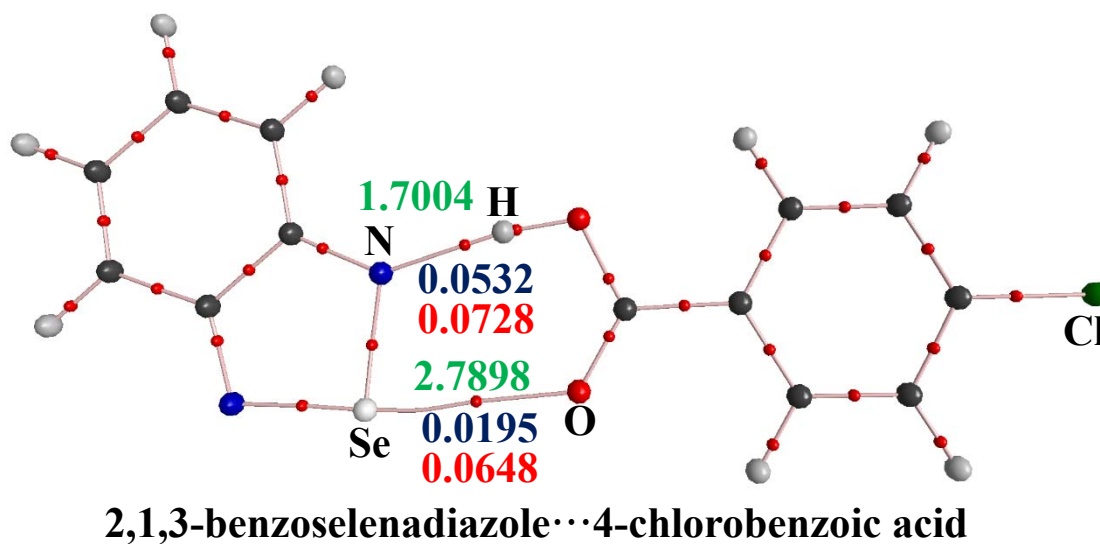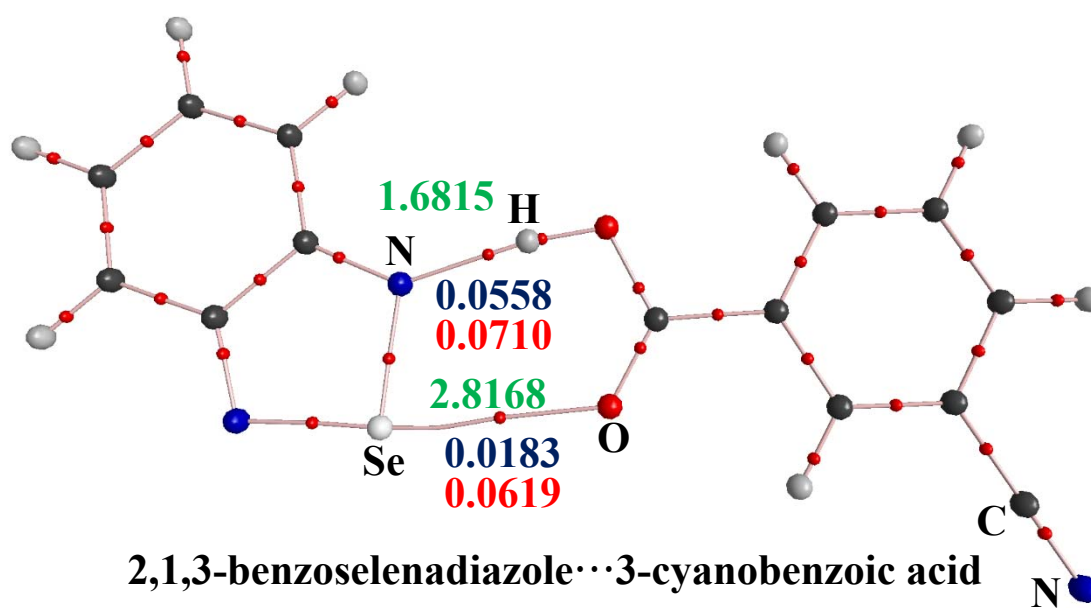

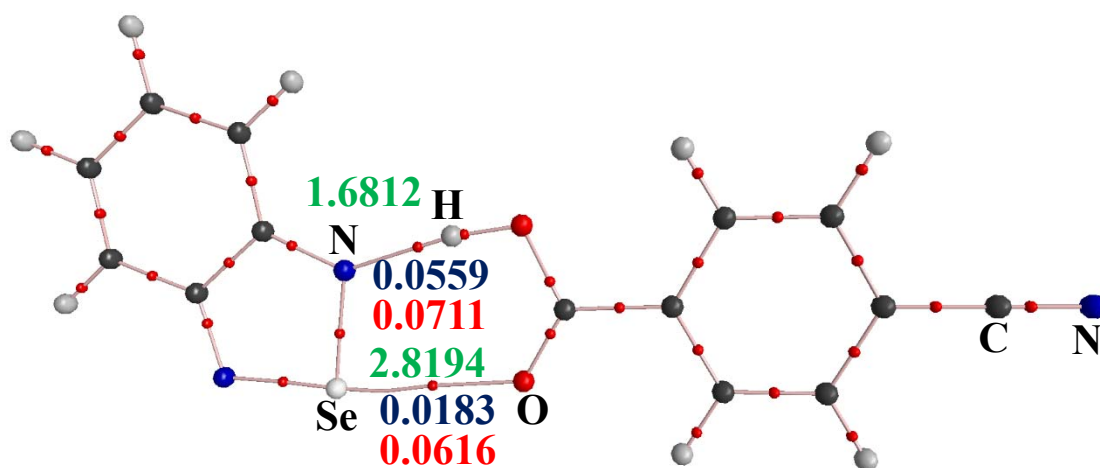

2,1,3-benzoselenadiazole...4-cyanobenzoic acid

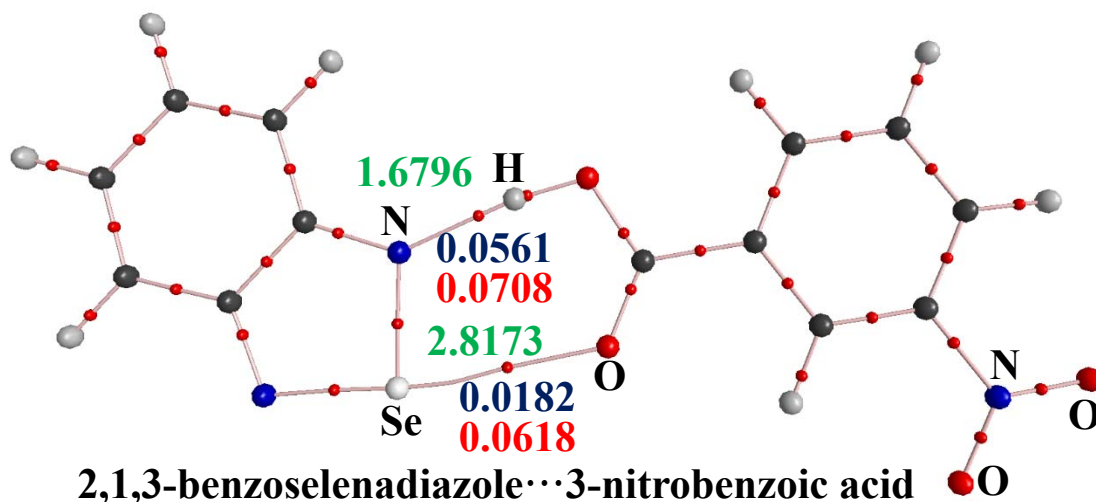

2,1,3-benzoselenadiazole...3-nitrobenzoic acid

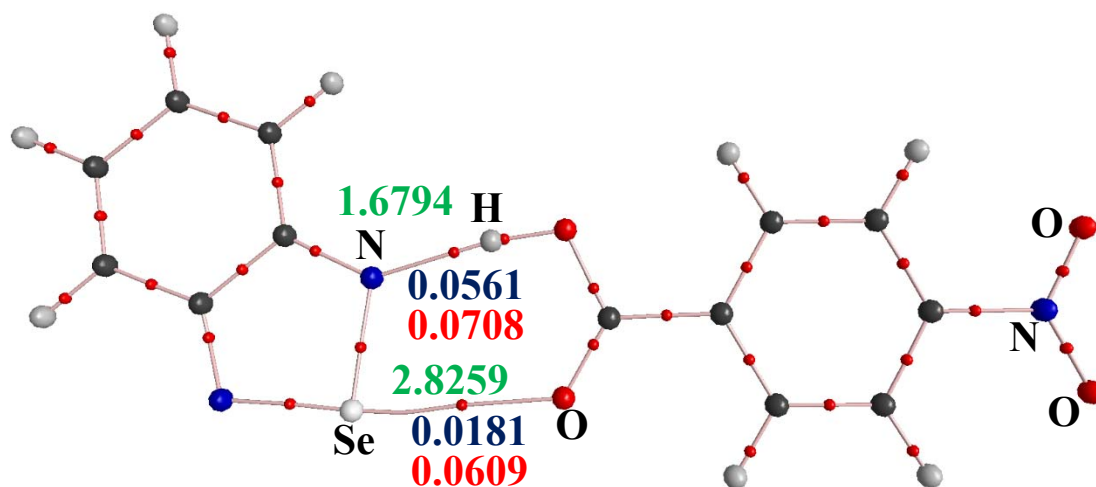

2,1,3-benzoselenadiazole...4-nitrobenzoic acid



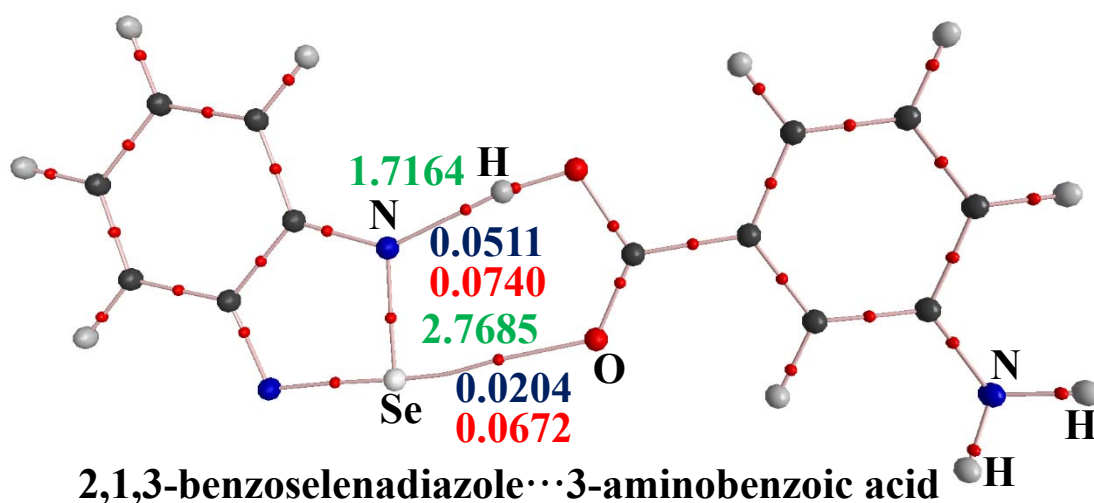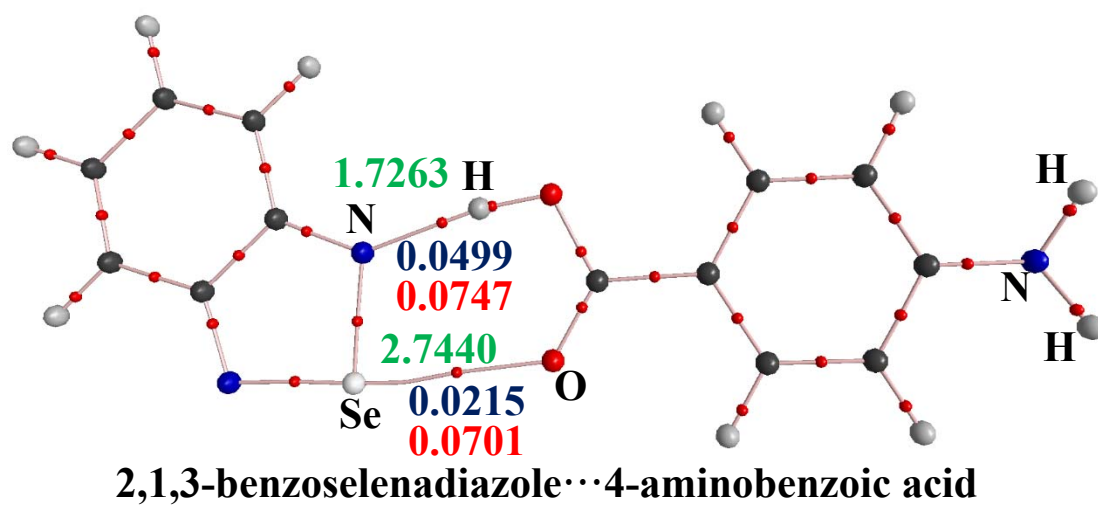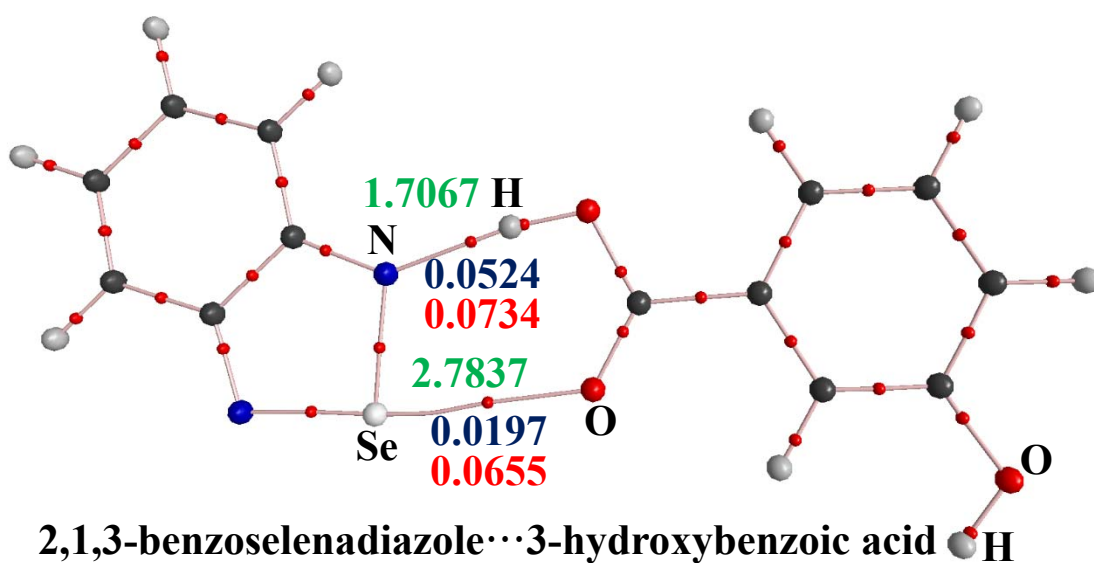

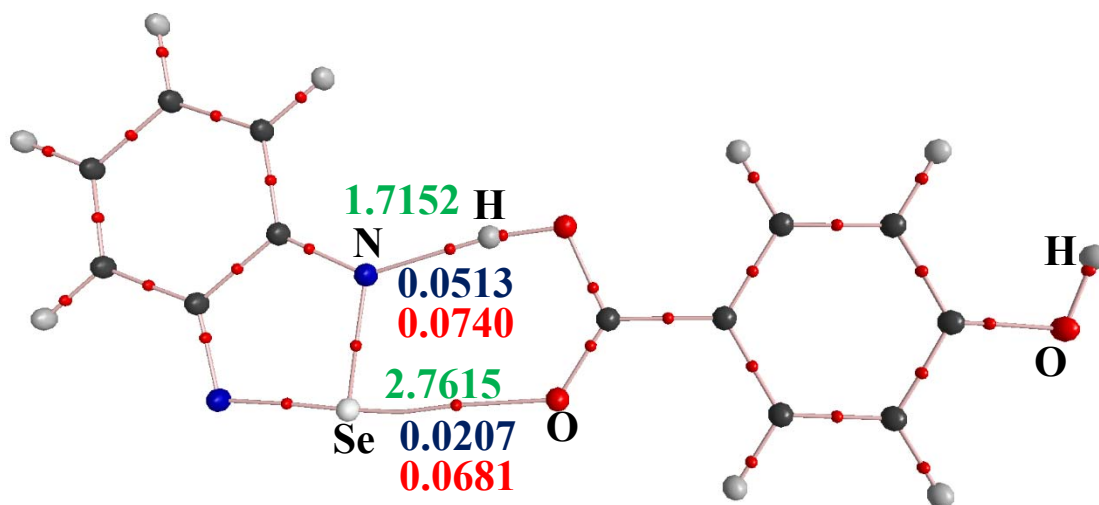

**2,1,3-benzoselenadiazole···4-hydroxybenzoic acid**

3. Fig. S1 The H···N and Se···O interatomic distances (green numbers, in Å) and the electron densities (blue numbers, in au) and their Laplacians (red numbers, in au) at the H···N and Se···O bond critical points in the cyclic supramolecular heterosynthons  $[-\text{Se}-\text{N}=\cdots[\text{HOOC}-]$  for the complexes formed between 2,1,3-benzoselenadiazole and a series of substituted and unsubstituted benzoic acid.

**4. Cartesian coordinates for the  $\pi$ -stacked cluster formed by six 2,1,3-benzoselenadiazole molecules and six isophthalic acid molecules.**

|    |           |           |           |
|----|-----------|-----------|-----------|
| Se | -3.560425 | -3.431732 | 0.279888  |
| N  | -4.737601 | -3.538894 | 1.606806  |
| C  | -4.092291 | -3.620722 | 2.757909  |
| C  | -4.701846 | -3.702804 | 4.036953  |
| H  | -5.781038 | -3.687977 | 4.114868  |
| C  | -3.898685 | -3.794271 | 5.131299  |
| H  | -4.343084 | -3.860371 | 6.116967  |
| N  | -2.194212 | -3.521035 | 1.411320  |
| C  | -2.654758 | -3.617485 | 2.646989  |
| C  | -1.854989 | -3.715190 | 3.814911  |
| H  | -0.776670 | -3.710422 | 3.724370  |
| C  | -2.478510 | -3.805762 | 5.020178  |
| H  | -1.887319 | -3.882423 | 5.924594  |
| Se | 8.360839  | -3.055993 | -2.055611 |
| N  | 7.568862  | -3.309544 | -0.480377 |
| C  | 8.511164  | -3.600549 | 0.400481  |
| C  | 8.286281  | -3.841682 | 1.781518  |
| H  | 7.279258  | -3.792979 | 2.174400  |
| C  | 9.357103  | -4.108632 | 2.575222  |
| H  | 9.206391  | -4.281545 | 3.633804  |
| N  | 9.975173  | -3.380669 | -1.418711 |
| C  | 9.858351  | -3.644137 | -0.127862 |
| C  | 10.943024 | -3.939239 | 0.741755  |
| H  | 11.948073 | -3.966001 | 0.342280  |
| C  | 10.684093 | -4.159233 | 2.057385  |
| H  | 11.501018 | -4.366580 | 2.737245  |
| Se | -2.605976 | 3.472567  | 0.844112  |
| N  | -3.746762 | 3.290767  | 2.194214  |
| C  | -3.070723 | 3.148762  | 3.321787  |
| C  | -3.645500 | 2.985367  | 4.608693  |
| H  | -4.722392 | 2.965005  | 4.713146  |
| C  | -2.813633 | 2.854076  | 5.676730  |
| H  | -3.231364 | 2.730316  | 6.668479  |
| N  | -1.209936 | 3.343307  | 1.934242  |
| C  | -1.636640 | 3.173388  | 3.173907  |
| C  | -0.805165 | 3.018370  | 4.313481  |
| H  | 0.270137  | 3.019944  | 4.192241  |
| C  | -1.396854 | 2.865893  | 5.528975  |
| H  | -0.781453 | 2.748033  | 6.412575  |
| Se | 9.218434  | 2.768425  | -1.693240 |
| N  | 8.459565  | 2.989409  | -0.097776 |

|    |            |           |           |
|----|------------|-----------|-----------|
| C  | 9.416282   | 2.940250  | 0.813335  |
| C  | 9.210769   | 3.049001  | 2.213902  |
| H  | 8.207961   | 3.184176  | 2.597095  |
| C  | 10.290171  | 2.960451  | 3.035366  |
| H  | 10.151640  | 3.028505  | 4.107462  |
| N  | 10.844912  | 2.628113  | -1.020605 |
| C  | 10.752847  | 2.741338  | 0.294119  |
| C  | 11.849509  | 2.664061  | 1.194820  |
| H  | 12.845642  | 2.508753  | 0.802361  |
| C  | 11.608262  | 2.768677  | 2.528064  |
| H  | 12.430313  | 2.694095  | 3.228949  |
| Se | -9.015546  | -0.063944 | 1.007397  |
| N  | -10.502290 | 0.152934  | 0.080869  |
| C  | -10.173814 | 0.261539  | -1.196685 |
| C  | -11.100686 | 0.450857  | -2.256626 |
| H  | -12.155782 | 0.515118  | -2.028169 |
| C  | -10.622554 | 0.546715  | -3.525442 |
| H  | -11.312972 | 0.690832  | -4.347544 |
| N  | -7.975679  | 0.003330  | -0.434338 |
| C  | -8.757278  | 0.178009  | -1.487206 |
| C  | -8.305042  | 0.282706  | -2.827937 |
| H  | -7.245906  | 0.217325  | -3.039239 |
| C  | -9.228996  | 0.461601  | -3.809076 |
| H  | -8.903074  | 0.543175  | -4.839140 |
| Se | 3.065939   | 0.219120  | -0.120534 |
| N  | 1.740296   | 0.405681  | -1.284349 |
| C  | 2.237549   | 0.471079  | -2.508032 |
| C  | 1.477784   | 0.624819  | -3.695791 |
| H  | 0.400377   | 0.700927  | -3.632006 |
| C  | 2.139042   | 0.673500  | -4.882698 |
| H  | 1.578868   | 0.791489  | -5.802337 |
| N  | 4.283441   | 0.238977  | -1.414944 |
| C  | 3.675495   | 0.374983  | -2.581934 |
| C  | 4.325144   | 0.427401  | -3.841959 |
| H  | 5.403074   | 0.353181  | -3.888385 |
| C  | 3.557816   | 0.573034  | -4.955580 |
| H  | 4.032460   | 0.616834  | -5.928317 |
| O  | -6.046469  | -3.418456 | -1.106918 |
| O  | -7.275993  | -3.460529 | 0.757027  |
| H  | -6.361640  | -3.489861 | 1.164892  |
| C  | -9.622437  | -3.214016 | -0.627913 |
| H  | -9.648434  | -3.243677 | 0.451250  |
| C  | -8.408388  | -3.315844 | -1.294275 |
| C  | -8.372074  | -3.284160 | -2.683698 |

|   |            |           |           |
|---|------------|-----------|-----------|
| H | -7.410372  | -3.360852 | -3.174821 |
| C | -9.544012  | -3.141210 | -3.407662 |
| H | -9.513344  | -3.113094 | -4.489412 |
| C | -7.127625  | -3.408012 | -0.550383 |
| O | -13.116047 | -2.540722 | -1.268641 |
| O | -12.047328 | -2.989148 | 0.639381  |
| H | -12.931637 | -2.790161 | 0.968455  |
| C | -10.792688 | -3.041817 | -1.354611 |
| C | -10.751422 | -3.005761 | -2.745562 |
| H | -11.677770 | -2.858702 | -3.285417 |
| C | -12.099259 | -2.831879 | -0.692605 |
| O | 5.674717   | -2.769103 | -2.771800 |
| O | 4.898901   | -3.159768 | -0.715431 |
| H | 5.881305   | -3.188258 | -0.522506 |
| C | 2.283567   | -3.055972 | -1.550997 |
| H | 2.485521   | -3.147430 | -0.493682 |
| C | 3.332016   | -2.949181 | -2.455036 |
| C | 3.068658   | -2.838829 | -3.817578 |
| H | 3.905034   | -2.754260 | -4.498710 |
| C | 1.762521   | -2.834926 | -4.274524 |
| H | 1.559708   | -2.746928 | -5.334276 |
| C | 4.745540   | -2.947845 | -2.004908 |
| O | -1.329881  | -3.192214 | -1.458858 |
| O | 0.175417   | -3.230339 | 0.189757  |
| H | -0.661544  | -3.338111 | 0.727280  |
| C | 0.972895   | -3.043086 | -2.011575 |
| C | 0.715143   | -2.934333 | -3.373566 |
| H | -0.316138  | -2.930633 | -3.703066 |
| C | -0.175463  | -3.158681 | -1.078187 |
| O | -5.123390  | 3.606173  | -0.469196 |
| O | -6.304306  | 3.267714  | 1.395559  |
| H | -5.379866  | 3.254014  | 1.780445  |
| C | -8.696030  | 3.448072  | 0.071407  |
| H | -8.696782  | 3.292795  | 1.140292  |
| C | -7.491046  | 3.568437  | -0.609241 |
| C | -7.485800  | 3.773348  | -1.984223 |
| H | -6.531062  | 3.863231  | -2.486664 |
| C | -8.680192  | 3.855552  | -2.680928 |
| H | -8.673835  | 4.011378  | -3.752161 |
| C | -6.190149  | 3.483071  | 0.100771  |
| O | -12.260223 | 3.315200  | -0.543741 |
| O | -11.109664 | 3.235751  | 1.367657  |
| H | -12.007032 | 3.087580  | 1.688139  |
| C | -9.892032  | 3.518822  | -0.630782 |

|   |            |           |           |
|---|------------|-----------|-----------|
| C | -9.881658  | 3.724298  | -2.008055 |
| H | -10.828742 | 3.768567  | -2.529396 |
| C | -11.204155 | 3.350646  | 0.033542  |
| O | 6.537265   | 3.191963  | -2.429153 |
| O | 5.817570   | 3.359461  | -0.321955 |
| H | 6.790268   | 3.197409  | -0.143848 |
| C | 3.208689   | 3.644942  | -1.113869 |
| H | 3.419329   | 3.485064  | -0.066690 |
| C | 4.242377   | 3.645069  | -2.039707 |
| C | 3.969364   | 3.854308  | -3.388113 |
| H | 4.792831   | 3.838793  | -4.090187 |
| C | 2.667668   | 4.067630  | -3.807931 |
| H | 2.457165   | 4.234458  | -4.856718 |
| C | 5.641377   | 3.379859  | -1.625539 |
| O | -0.397533  | 3.806031  | -0.943517 |
| O | 1.136787   | 3.531599  | 0.656210  |
| H | 0.309130   | 3.446926  | 1.211766  |
| C | 1.899385   | 3.819984  | -1.542412 |
| C | 1.631701   | 4.039112  | -2.888921 |
| H | 0.601614   | 4.171488  | -3.194639 |
| C | 0.764091   | 3.726360  | -0.591683 |
| O | 0.691698   | 0.117517  | 1.620027  |
| O | -0.677329  | 0.230724  | -0.142687 |
| H | 0.192352   | 0.329808  | -0.627709 |
| C | -2.909956  | -0.061920 | 1.375689  |
| H | -3.003991  | 0.050596  | 0.305661  |
| C | -1.653004  | -0.065145 | 1.965153  |
| C | -1.534060  | -0.213938 | 3.343091  |
| H | -0.542970  | -0.214623 | 3.778224  |
| C | -2.667026  | -0.354266 | 4.127106  |
| H | -2.572523  | -0.468473 | 5.198998  |
| C | -0.425999  | 0.099891  | 1.143573  |
| O | -6.419003  | -0.309860 | 2.206442  |
| O | -5.381658  | -0.060143 | 0.243294  |
| H | -6.324674  | -0.054576 | -0.092022 |
| C | -4.045788  | -0.201629 | 2.162072  |
| C | -3.921262  | -0.346179 | 3.540163  |
| H | -4.821217  | -0.450718 | 4.132142  |
| C | -5.399730  | -0.196448 | 1.552079  |
| O | 12.555596  | -0.843492 | 1.825031  |
| O | 11.517386  | -0.588565 | -0.136268 |
| H | 12.426684  | -0.677517 | -0.443386 |
| C | 9.057746   | -0.373643 | 1.018817  |
| H | 9.138338   | -0.321604 | -0.057729 |

|   |           |           |           |
|---|-----------|-----------|-----------|
| C | 10.191719 | -0.550943 | 1.799659  |
| C | 10.080532 | -0.616878 | 3.184765  |
| H | 10.982497 | -0.755405 | 3.767174  |
| C | 8.839967  | -0.506944 | 3.787640  |
| H | 8.754570  | -0.557834 | 4.865953  |
| C | 11.539327 | -0.677605 | 1.199311  |
| O | 5.471868  | -0.042801 | 1.340357  |
| O | 6.777769  | -0.011267 | -0.470960 |
| H | 5.884150  | 0.089136  | -0.916460 |
| C | 7.812859  | -0.267566 | 1.624768  |
| C | 7.706908  | -0.334454 | 3.009150  |
| H | 6.722944  | -0.250742 | 3.453096  |
| C | 6.572046  | -0.095239 | 0.825484  |

## Notes and references

- 1 CrysAlisPro, Rigaku Oxford Diffraction, Version 1.171.39.6a, England, 2018.
- 2 G. M. Sheldrick, *Acta Cryst.*, 2008, **A64**, 112–122.
- 3 C. Adamo and V. Barone, *J. Chem. Phys.*, 1999, **110**, 6158–6169.
- 4 S. Grimme, J. Antony, S. Ehrlich and H. Krieg, *J. Chem. Phys.*, 2010, **132**, 154104.
- 5 S. Grimme, S. Ehrlich and L. Goerigk, *J. Comput. Chem.*, 2011, **32**, 1456–1465.
- 6 F. Weigend and R. Ahlrichs, *Phys. Chem. Chem. Phys.*, 2005, **7**, 3297–3305.
- 7 Gaussian 09, Revision D.01, M. J. Frisch, G. W. Trucks, H. B. Schlegel, G. E. Scuseria, M. A. Robb, J. R. Cheeseman, G. Scalmani, V. Barone, B. Mennucci, G. A. Petersson, H. Nakatsuji, M. Caricato, X. Li, H. P. Hratchian, A. F. Izmaylov, J. Bloino, G. Zheng, J. L. Sonnenberg, M. Hada, M. Ehara, K. Toyota, R. Fukuda, J. Hasegawa, M. Ishida, T. Nakajima, Y. Honda, O. Kitao, H. Nakai, T. Vreven, J. A. Montgomery, Jr., J. E. Peralta, F. Ogliaro, M. Bearpark, J. J. Heyd, E. Brothers, K. N. Kudin, V. N. Staroverov, T. Keith, R. Kobayashi, J. Normand, K. Raghavachari, A. Rendell, J. C. Burant, S. S. Iyengar, J. Tomasi, M. Cossi, N. Rega, J. M. Millam, M. Klene, J. E. Knox, J. B. Cross, V. Bakken, C. Adamo, J. Jaramillo, R. Gomperts, R. E. Stratmann, O. Yazyev, A. J. Austin, R. Cammi, C. Pomelli, J. W. Ochterski, R. L. Martin, K. Morokuma, V. G. Zakrzewski, G. A. Voth, P. Salvador, J. J. Dannenberg, S. Dapprich, A. D. Daniels, O. Farkas, J. B. Foresman, J. V. Ortiz, J. Cioslowski, and D. J. Fox, Gaussian, Inc., Wallingford CT, 2013.
- 8 W. Wang, T. Sun, Y. Zhang and Y. B. Wang, *J. Chem. Phys.*, 2015, **143**, 114312.
- 9 W. Wang, Y. Zhang and Y. B. Wang, *Int. J. Quantum Chem.*, 2017, **117**, e25345.
- 10 R. F. W. Bader, *Atoms in Molecules, A Quantum Theory*, Clarendon Press, Oxford, 1990.
- 11 F. Biegler-König, J. Schönbohm and D. Bayles, *J. Comput. Chem.*, 2001, **22**, 545–559.
- 12 A. E. Reed, L. A. Curtiss and F. Weinhold, *Chem. Rev.*, 1988, **88**, 899–926.



**5. The CheckCIF reports for cocrystals I, II and III.**

## checkCIF/PLATON report

Structure factors have been supplied for datablock(s) 2239190, 2239191, 2239194

THIS REPORT IS FOR GUIDANCE ONLY. IF USED AS PART OF A REVIEW PROCEDURE FOR PUBLICATION, IT SHOULD NOT REPLACE THE EXPERTISE OF AN EXPERIENCED CRYSTALLOGRAPHIC REFEREE.

No syntax errors found. CIF dictionary Interpreting this report

### Datablock: 2239190

---

|                        |                         |                         |                  |
|------------------------|-------------------------|-------------------------|------------------|
| Bond precision:        | C-C = 0.0034 A          | Wavelength=0.71073      |                  |
| Cell:                  | a=6.6846(2)             | b=7.0498(2)             | c=15.0256(4)     |
|                        | alpha=97.105(2)         | beta=94.771(2)          | gamma=109.331(3) |
| Temperature:           | 290 K                   |                         |                  |
|                        | Calculated              | Reported                |                  |
| Volume                 | 657.18(4)               | 657.18(3)               |                  |
| Space group            | P -1                    | P -1                    |                  |
| Hall group             | -P 1                    | -P 1                    |                  |
| Moiety formula         | C7 H5 N O4, C6 H4 N2 Se | C6 H4 N2 Se, C7 H5 N O4 |                  |
| Sum formula            | C13 H9 N3 O4 Se         | C13 H9 N3 O4 Se         |                  |
| Mr                     | 350.19                  | 350.19                  |                  |
| Dx, g cm <sup>-3</sup> | 1.770                   | 1.770                   |                  |
| Z                      | 2                       | 2                       |                  |
| Mu (mm <sup>-1</sup> ) | 2.877                   | 2.877                   |                  |
| F000                   | 348.0                   | 348.0                   |                  |
| F000'                  | 347.97                  |                         |                  |
| h, k, lmax             | 8, 9, 20                | 8, 9, 19                |                  |
| Nref                   | 3319                    | 3008                    |                  |
| Tmin, Tmax             | 0.451, 0.501            | 0.754, 1.000            |                  |
| Tmin'                  | 0.442                   |                         |                  |

Correction method= # Reported T Limits: Tmin=0.754 Tmax=1.000  
AbsCorr = MULTI-SCAN

Data completeness= 0.906 Theta(max)= 28.469

R(reflections)= 0.0308( 2720) wR2(reflections)=  
S = 1.097 Npar= 191 0.0684( 3008)

---

The following ALERTS were generated. Each ALERT has the format  
**test-name\_ALERT\_alert-type\_alert-level.**

Click on the hyperlinks for more details of the test.

---

**Alert level C**

|                   |                                                  |              |
|-------------------|--------------------------------------------------|--------------|
| PLAT042_ALERT_1_C | Calc. and Reported MoietyFormula Strings Differ  | Please Check |
| PLAT906_ALERT_3_C | Large K Value in the Analysis of Variance .....  | 2.561 Check  |
| PLAT934_ALERT_3_C | Number of (Iobs-Icalc)/Sigma(W) > 10 Outliers .. | 1 Check      |

---

**Alert level G**

|                   |                                                  |              |
|-------------------|--------------------------------------------------|--------------|
| PLAT007_ALERT_5_G | Number of Unrefined Donor-H Atoms .....          | 1 Report     |
| PLAT012_ALERT_1_G | No _shelx_res_checksum Found in CIF .....        | Please Check |
| PLAT910_ALERT_3_G | Missing # of FCF Reflection(s) Below Theta(Min). | 4 Note       |
| PLAT912_ALERT_4_G | Missing # of FCF Reflections Above STh/L= 0.600  | 304 Note     |
| PLAT978_ALERT_2_G | Number C-C Bonds with Positive Residual Density. | 7 Info       |

---

- 0 **ALERT level A** = Most likely a serious problem - resolve or explain
- 0 **ALERT level B** = A potentially serious problem, consider carefully
- 3 **ALERT level C** = Check. Ensure it is not caused by an omission or oversight
- 5 **ALERT level G** = General information/check it is not something unexpected

- 2 ALERT type 1 CIF construction/syntax error, inconsistent or missing data
  - 1 ALERT type 2 Indicator that the structure model may be wrong or deficient
  - 3 ALERT type 3 Indicator that the structure quality may be low
  - 1 ALERT type 4 Improvement, methodology, query or suggestion
  - 1 ALERT type 5 Informative message, check
- 

## Datablock: 2239191

---

Bond precision: C-C = 0.0045 A

Wavelength=0.71073

Cell: a=6.7936(2) b=7.3480(3) c=14.7847(5)  
alpha=76.886(3) beta=76.865(3) gamma=69.400(4)  
Temperature: 290 K

|                        | Calculated              | Reported                |
|------------------------|-------------------------|-------------------------|
| Volume                 | 663.98(4)               | 663.98(4)               |
| Space group            | P -1                    | P -1                    |
| Hall group             | -P 1                    | -P 1                    |
| Moiety formula         | C7 H5 N O4, C6 H4 N2 Se | C6 H4 N2 Se, C7 H5 N O4 |
| Sum formula            | C13 H9 N3 O4 Se         | C13 H9 N3 O4 Se         |
| Mr                     | 350.19                  | 350.19                  |
| Dx, g cm <sup>-3</sup> | 1.752                   | 1.752                   |
| Z                      | 2                       | 2                       |
| Mu (mm <sup>-1</sup> ) | 2.848                   | 2.848                   |
| F000                   | 348.0                   | 348.0                   |
| F000'                  | 347.97                  |                         |
| h, k, lmax             | 9, 9, 19                | 8, 9, 19                |
| Nref                   | 3319                    | 3024                    |
| Tmin, Tmax             | 0.496, 0.519            | 0.729, 1.000            |
| Tmin'                  | 0.486                   |                         |

Correction method= # Reported T Limits: Tmin=0.729 Tmax=1.000  
AbsCorr = MULTI-SCAN

Data completeness= 0.911                      Theta(max)= 28.350

R(reflections)= 0.0414( 2581)                      wR2(reflections)=  
0.0980( 3024)  
S = 1.092                      Npar= 191

The following ALERTS were generated. Each ALERT has the format

**test-name\_ALERT\_alert-type\_alert-level.**

Click on the hyperlinks for more details of the test.

### Alert level B

PLAT094\_ALERT\_2\_B Ratio of Maximum / Minimum Residual Density .... 4.05 Report  
PLAT196\_ALERT\_1\_B No TEMP record and \_measurement\_temperature .NE. 293 Degree

### Alert level C

PLAT042\_ALERT\_1\_C Calc. and Reported MoietyFormula Strings Differ Please Check  
PLAT250\_ALERT\_2\_C Large U3/U1 Ratio for Average U(i,j) Tensor .... 2.2 Note  
PLAT906\_ALERT\_3\_C Large K Value in the Analysis of Variance ..... 4.000 Check  
PLAT910\_ALERT\_3\_C Missing # of FCF Reflection(s) Below Theta(Min). 5 Note

### Alert level G

PLAT007\_ALERT\_5\_G Number of Unrefined Donor-H Atoms ..... 1 Report  
PLAT012\_ALERT\_1\_G No \_shelx\_res\_checksum Found in CIF ..... Please Check  
PLAT720\_ALERT\_4\_G Number of Unusual/Non-Standard Labels ..... 1 Note  
PLAT912\_ALERT\_4\_G Missing # of FCF Reflections Above STh/L= 0.600 281 Note

---

0 **ALERT level A** = Most likely a serious problem - resolve or explain  
 2 **ALERT level B** = A potentially serious problem, consider carefully  
 4 **ALERT level C** = Check. Ensure it is not caused by an omission or oversight  
 5 **ALERT level G** = General information/check it is not something unexpected

3 ALERT type 1 CIF construction/syntax error, inconsistent or missing data  
 3 ALERT type 2 Indicator that the structure model may be wrong or deficient  
 2 ALERT type 3 Indicator that the structure quality may be low  
 2 ALERT type 4 Improvement, methodology, query or suggestion  
 1 ALERT type 5 Informative message, check

---

## Datablock: 2239194

---

Bond precision: C-C = 0.0160 Å                      Wavelength=0.71073

Cell:                      a=3.9284(2)              b=26.3154(12)              c=13.1324(6)  
                                 alpha=90              beta=91.977(4)              gamma=90

Temperature:              291 K

|                        | Calculated               | Reported                 |
|------------------------|--------------------------|--------------------------|
| Volume                 | 1356.79(11)              | 1356.79(11)              |
| Space group            | P 21                     | P 1 21 1                 |
| Hall group             | P 2yb                    | P 2yb                    |
| Moiety formula         | C9 H6 O6, 3(C6 H4 N2 Se) | 3(C6 H4 N2 Se), C9 H6 O6 |
| Sum formula            | C27 H18 N6 O6 Se3        | C27 H18 N6 O6 Se3        |
| Mr                     | 759.35                   | 759.35                   |
| Dx, g cm <sup>-3</sup> | 1.859                    | 1.859                    |
| Z                      | 2                        | 2                        |
| Mu (mm <sup>-1</sup> ) | 4.122                    | 4.122                    |
| F000                   | 744.0                    | 744.0                    |
| F000'                  | 743.76                   |                          |
| h, k, lmax             | 5, 35, 17                | 5, 34, 17                |
| Nref                   | 6915[ 3532]              | 6146                     |
| Tmin, Tmax             | 0.387, 0.438             | 0.554, 1.000             |
| Tmin'                  | 0.358                    |                          |

Correction method= # Reported T Limits: Tmin=0.554 Tmax=1.000  
 AbsCorr = MULTI-SCAN

Data completeness= 1.74/0.89                      Theta(max)= 28.531

R(reflections)= 0.0660( 4825)

wR2(reflections)=  
0.1107( 6146)

S = 1.059

Npar= 381

---

The following ALERTS were generated. Each ALERT has the format

**test-name\_ALERT\_alert-type\_alert-level.**

Click on the hyperlinks for more details of the test.

---

 **Alert level A**

PLAT430\_ALERT\_2\_A Short Inter D...A Contact Se2 ..N1 . 2.90 Ang.  
-x,1/2+y,2-z = 2\_557 Check

**Author Response: The Checkcif software has a bug and cannot identify chalcogen bonds.**

PLAT430\_ALERT\_2\_A Short Inter D...A Contact Se3 ..O3 . 2.82 Ang.  
x,y,z = 1\_555 Check

**Author Response: The Checkcif software has a bug and cannot identify chalcogen bonds.**

---

 **Alert level B**

PLAT196\_ALERT\_1\_B No TEMP record and \_measurement\_temperature .NE. 293 Degree  
PLAT341\_ALERT\_3\_B Low Bond Precision on C-C Bonds ..... 0.01596 Ang.  
PLAT927\_ALERT\_1\_B Reported and Calculated wR2 Differ by ..... 0.0095 Check

---

 **Alert level C**

STRVA01\_ALERT\_4\_C Flack test results are ambiguous.  
From the CIF: \_refine\_ls\_abs\_structure\_Flack 0.452  
From the CIF: \_refine\_ls\_abs\_structure\_Flack\_su 0.008  
PLAT042\_ALERT\_1\_C Calc. and Reported MoietyFormula Strings Differ Please Check  
PLAT234\_ALERT\_4\_C Large Hirshfeld Difference C25 --C26 . 0.17 Ang.  
PLAT906\_ALERT\_3\_C Large K Value in the Analysis of Variance ..... 3.978 Check  
PLAT910\_ALERT\_3\_C Missing # of FCF Reflection(s) Below Theta(Min). 8 Note  
PLAT926\_ALERT\_1\_C Reported and Calculated R1 Differ by ..... 0.0048 Check  
PLAT987\_ALERT\_1\_C The Flack x is >> 0 - Do a BASF/TWIN Refinement Please Check

---

 **Alert level G**

PLAT007\_ALERT\_5\_G Number of Unrefined Donor-H Atoms ..... 3 Report  
PLAT012\_ALERT\_1\_G No \_shelx\_res\_checksum Found in CIF ..... Please Check  
PLAT033\_ALERT\_4\_G Flack x Value Deviates > 3.0 \* sigma from Zero . 0.452 Note  
PLAT790\_ALERT\_4\_G Centre of Gravity not Within Unit Cell: Resd. # 2 Note  
C6 H4 N2 Se  
PLAT790\_ALERT\_4\_G Centre of Gravity not Within Unit Cell: Resd. # 3 Note  
C6 H4 N2 Se  
PLAT912\_ALERT\_4\_G Missing # of FCF Reflections Above STh/L= 0.600 252 Note  
PLAT978\_ALERT\_2\_G Number C-C Bonds with Positive Residual Density. 0 Info

---

2 **ALERT level A** = Most likely a serious problem - resolve or explain  
3 **ALERT level B** = A potentially serious problem, consider carefully  
7 **ALERT level C** = Check. Ensure it is not caused by an omission or oversight  
7 **ALERT level G** = General information/check it is not something unexpected

6 ALERT type 1 CIF construction/syntax error, inconsistent or missing data  
3 ALERT type 2 Indicator that the structure model may be wrong or deficient  
3 ALERT type 3 Indicator that the structure quality may be low  
6 ALERT type 4 Improvement, methodology, query or suggestion  
1 ALERT type 5 Informative message, check

---

---

It is advisable to attempt to resolve as many as possible of the alerts in all categories. Often the minor alerts point to easily fixed oversights, errors and omissions in your CIF or refinement strategy, so attention to these fine details can be worthwhile. In order to resolve some of the more serious problems it may be necessary to carry out additional measurements or structure refinements. However, the purpose of your study may justify the reported deviations and the more serious of these should normally be commented upon in the discussion or experimental section of a paper or in the "special\_details" fields of the CIF. checkCIF was carefully designed to identify outliers and unusual parameters, but every test has its limitations and alerts that are not important in a particular case may appear. Conversely, the absence of alerts does not guarantee there are no aspects of the results needing attention. It is up to the individual to critically assess their own results and, if necessary, seek expert advice.

### **Publication of your CIF in IUCr journals**

A basic structural check has been run on your CIF. These basic checks will be run on all CIFs submitted for publication in IUCr journals (*Acta Crystallographica*, *Journal of Applied Crystallography*, *Journal of Synchrotron Radiation*); however, if you intend to submit to *Acta Crystallographica Section C* or *E* or *IUCrData*, you should make sure that full publication checks are run on the final version of your CIF prior to submission.

### **Publication of your CIF in other journals**

Please refer to the *Notes for Authors* of the relevant journal for any special instructions relating to CIF submission.

---

**PLATON version of 28/11/2022; check.def file version of 28/11/2022**

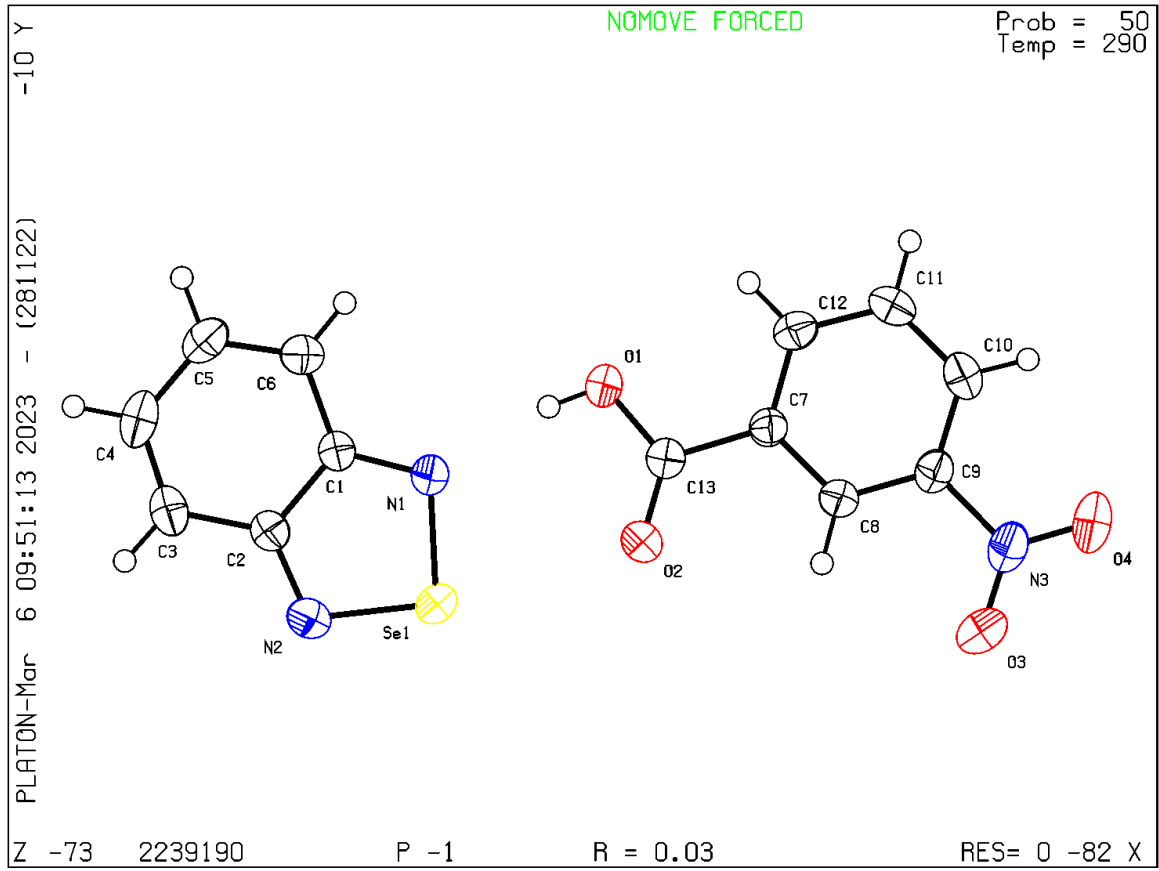



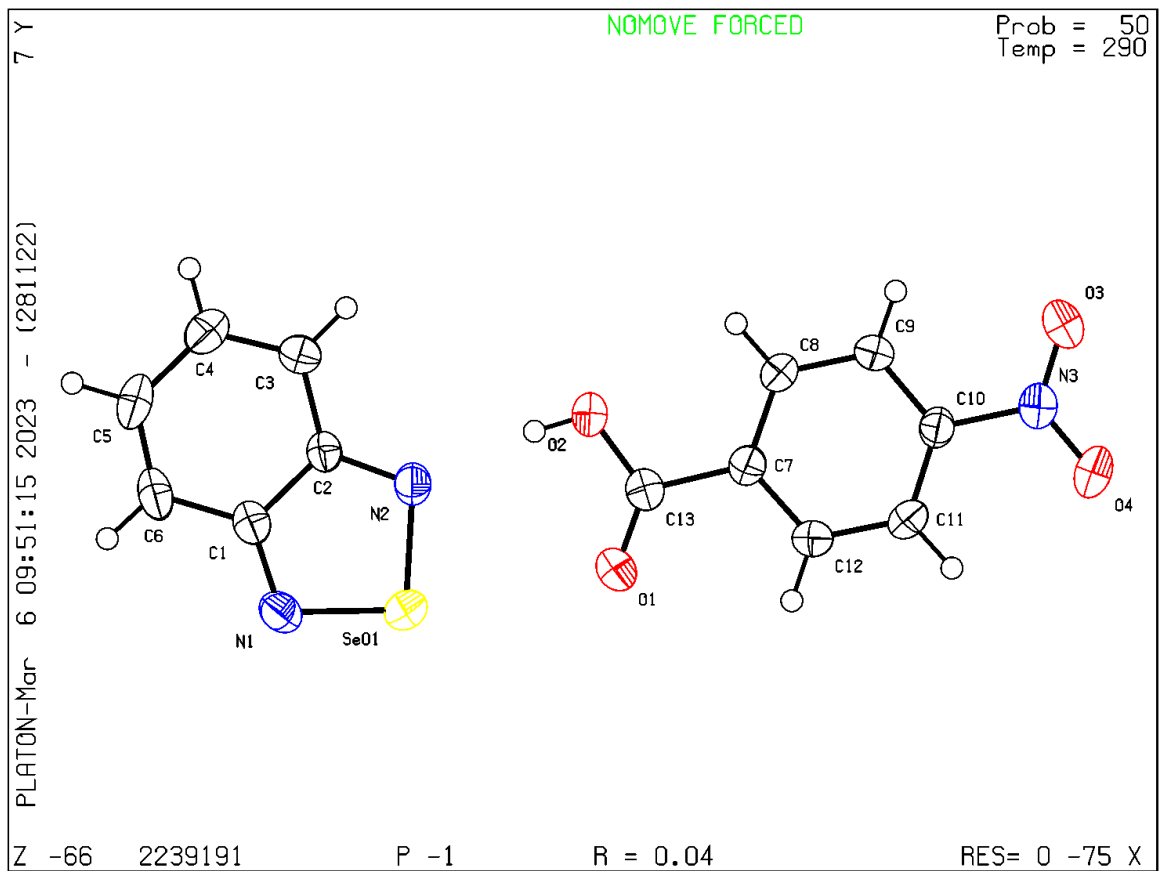

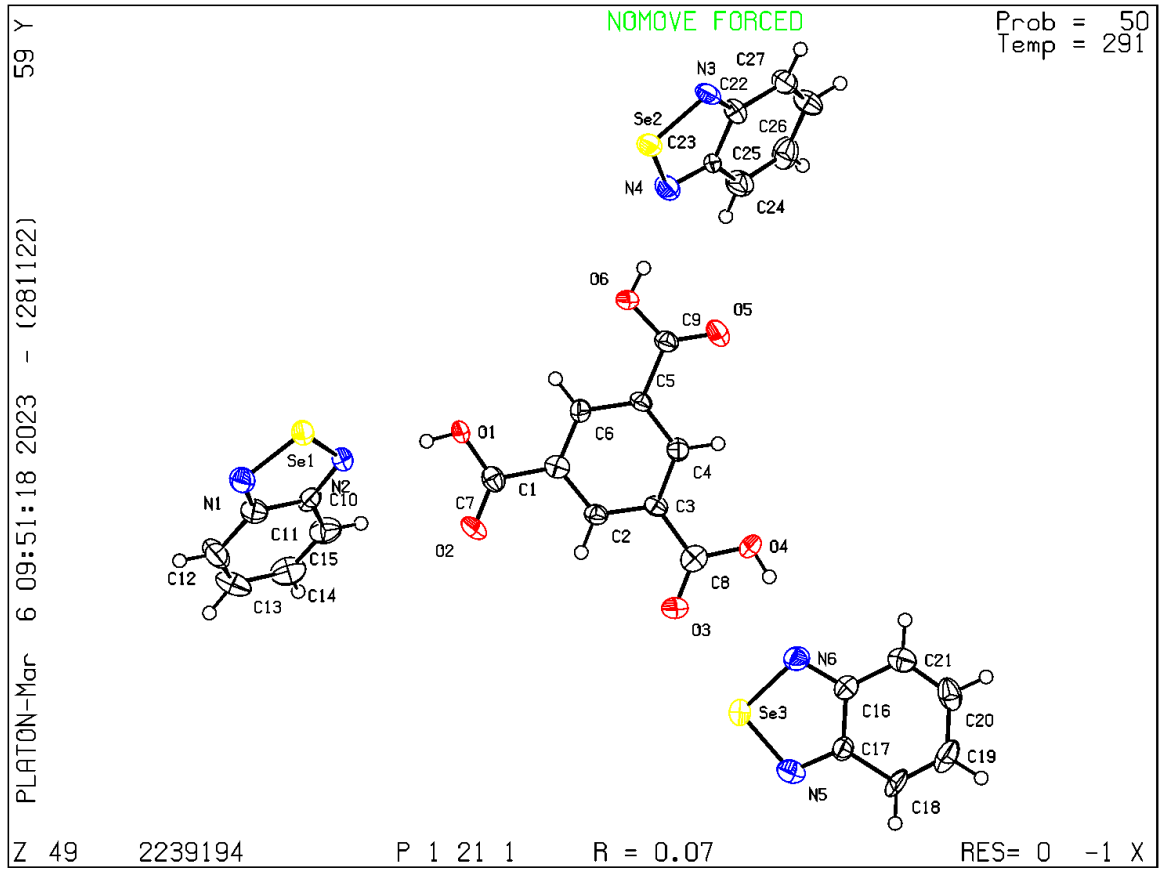

Supplement: d3ce00100h1.pdf [file d3ce00100h1.pdf]
